# Supplementary material for: Photoionization and ab initio study of Ba(H2O)n (n = 1–4) clusters
Source: Royal Society of Chemistry journal article supplement (doi:10.1039/c2cp23510b), 2012-01-01

## Photoionization and *ab initio* study of Ba(H<sub>2</sub>O)<sub>n</sub> (n = 1 – 4) clusters - Supplementary File -

I. Cabanillas-Vidosa, M. Rossa, G. A. Pino, J. C. Ferrero and C. J. Cobos

### Basis sets:

O-H: 6-311++G(d,p)

Ba: Relativistic Effective Core Potentials (RECP) and their basis sets:

- 1.- Bauschlicher *et al.*
- 2.- SDD
- 3.- Lim *et al.*

### Ionization Potentials:

Adiabatic:  $IE_a$  (eV) = {  $E^a[Ba^+(H_2O)_n] - E[Ba(H_2O)_n]$  } \* 27.2114

Vertical:  $IE_v$  (eV) = {  $E^v[Ba^+(H_2O)_n] - E[Ba(H_2O)_n]$  } \* 27.2114

Where:

$E[Ba(H_2O)_n]$  is the total energy of the optimized neutral cluster ( $E_0$ ) corrected by  $E_{ZPE}$  (zero point vibrational energy of neutral ground state);  $E^a[Ba^+(H_2O)_n]$  is the total energy ( $E_a$ ) of the optimized cationic cluster, corrected by  $E^a_{ZPE}$  (zero-point vibrational energy of ionic state) and  $E^v[Ba^+(H_2O)_n]$  is the total energy ( $E_v$ ) of the cationic cluster with the optimized geometry on the neutral state, also corrected by  $E^a_{ZPE}$ .

### Binding energy:

$\Delta E$  (kcal mol<sup>-1</sup>) = {  $E[Ba^m(H_2O)_n] - E[(H_2O)_n] - E[Ba^m]$  } \* 627.510

Where:

$m = 0$  and  $+1$ , in the neutral and ionic state, respectively;  $E[(H_2O)_n]$  is the total energy ( $E_w$ ) of the optimized neutral water cluster corrected by the  $E^w_{ZPE}$  and  $E[Ba]$  is the total energy of the barium atom.

### Gibbs free energy of reaction:

$\Delta_r G^{75\text{K}}$  (kcal mol<sup>-1</sup>) =  $\Delta_f G [Ba(H_2O)_n] - \Delta_f G [Ba] - n * \Delta_f G [H_2O]$

Note: All energy values ( $E$ ) are in Hartrees.

## Basis sets selection:

### H and O atoms:

To analyze basis set effect on the values of calculated ionization energy (IE) for  $\text{Ba}(\text{H}_2\text{O})_n$  clusters, DFT single-point energy calculations with gradually increasing basis set were performed:

| Specie <sup>*</sup>               | Theory          | Basis set            | $E_0^{**}$  | $E_{ion}^{**}$ | $\text{IE}_v^{**}$ |
|-----------------------------------|-----------------|----------------------|-------------|----------------|--------------------|
| $\text{Ba}(\text{H}_2\text{O})_1$ | <i>mPW1PW91</i> | 6-31G                | -101.845409 | -101.681922    | <b>4.45</b>        |
|                                   |                 | 6-311G(d)            | -101.884747 | -101.720323    | <b>4.47</b>        |
|                                   |                 | 6-311G(d,p)          | -101.895964 | -101.731171    | <b>4.48</b>        |
|                                   |                 | 6-311+G(d,p)         | -101.898875 | -101.733237    | <b>4.51</b>        |
|                                   |                 | <b>6-311++G(d,p)</b> | -101.898964 | -101.733282    | <b>4.51</b>        |
|                                   |                 | 6-311++G(2d,p)       | -101.898771 | -101.733009    | <b>4.51</b>        |
|                                   |                 | 6-311++G(3d,p)       | -101.899442 | -101.733672    | <b>4.51</b>        |
|                                   |                 | 6-311++G(3df,p)      | -101.900305 | -101.734541    | <b>4.51</b>        |
|                                   |                 | 6-311++G(3df,3pd)    | -101.902432 | -101.736659    | <b>4.51</b>        |
|                                   |                 | AUG-cc-PVQZ          | -101.910097 | -101.744341    | <b>4.51</b>        |

| Specie <sup>*</sup>                                            | Theory          | Basis set            | $E_0^{**}$  | $E_{ion}^{**}$ | $\text{IE}_v^{**}$ |
|----------------------------------------------------------------|-----------------|----------------------|-------------|----------------|--------------------|
| $\text{Ba}(\text{H}_2\text{O})_4$<br>isomer (4+0) <sub>a</sub> | <i>mPW1PW91</i> | 6-31G                | -331.044265 | -330.905847    | <b>3.77</b>        |
|                                                                |                 | 6-311G(d)            | -331.206237 | -331.066652    | <b>3.80</b>        |
|                                                                |                 | 6-311G(d,p)          | -331.251312 | -331.111796    | <b>3.80</b>        |
|                                                                |                 | 6-311+G(d,p)         | -331.261613 | -331.120371    | <b>3.84</b>        |
|                                                                |                 | <b>6-311++G(d,p)</b> | -331.261792 | -331.120513    | <b>3.84</b>        |
|                                                                |                 | 6-311++G(2d,p)       | -331.262055 | -331.120854    | <b>3.84</b>        |
|                                                                |                 | 6-311++G(3d,p)       | -331.264722 | -331.123689    | <b>3.84</b>        |
|                                                                |                 | 6-311++G(3df,p)      | -331.267741 | -331.126725    | <b>3.84</b>        |
|                                                                |                 | 6-311++G(3df,3pd)    | -331.276145 | -331.135130    | <b>3.84</b>        |
|                                                                |                 | AUG-cc-PVQZ          | -305.835932 | -331.164604    | <b>3.83</b>        |

\* RECP used for Ba atom: Lim *et al.*

\*\* Note that the values are not corrected by the zero point vibrational energies ( $E_{\text{ZPE}}$ ).

From the results, 6-311++G(d,p) basis set is seen to be able to reproduce the barium-water ionization energy. The ionization energy not changes by the basis set increasing [from the 6-311+G(d,p)], and it indicates that the delocalized electron on the neutral state is well described by the selected basis set. In addition, the calculated binding energies and bond distances for the dimer, trimer and tetramer water clusters,  $(\text{H}_2\text{O})_n$  ( $n = 2 - 4$ ) using 6-311++G(d,p) basis sets reproduce reasonably well the experimental values (see Section 5.1).

## Basis sets selection:

### Ba atom:

The results from the three RECP's and their basis sets were evaluated by comparison to experimental values:

| Specie | Theory   | RECP                  | $E_{neutral}$ | $E_{ion(+1)}$ | IE          |
|--------|----------|-----------------------|---------------|---------------|-------------|
| Ba     | mPW1PW91 | Bausch. <i>et al.</i> | -25.421894    | -25.236026    | <b>5.06</b> |
|        |          | SDD                   | -25.441871    | -25.255232    | <b>5.08</b> |
|        |          | Lim <i>et al.</i>     | -25.445940    | -25.258481    | <b>5.10</b> |
|        |          | Experimental value:   |               |               |             |

| Specie | Theory       | RECP                  | $E_{neutral}$ | $E_{ion(+1)}$ | IE          |
|--------|--------------|-----------------------|---------------|---------------|-------------|
| Ba     | CCSD(T,Full) | Bausch. <i>et al.</i> | -25.322073    | -25.133532    | <b>5.13</b> |
|        |              | SDD                   | -25.258984    | -25.073281    | <b>5.05</b> |
|        |              | Lim <i>et al.</i>     | -25.378212    | -25.187920    | <b>5.18</b> |
|        |              | Experimental value:   |               |               |             |

| Specie          | Theory   | RECP                  | $E_{ion(+1)}$ | $E_{ion(+2)}$ | IE          |
|-----------------|----------|-----------------------|---------------|---------------|-------------|
| Ba <sup>+</sup> | mPW1PW91 | Bausch. <i>Et al.</i> | -25.236026    | -24.871354    | <b>9.92</b> |
|                 |          | SDD                   | -25.255232    | -24.890441    | <b>9.93</b> |
|                 |          | Lim <i>et al.</i>     | -25.258481    | -24.891405    | <b>9.99</b> |
|                 |          | Experimental value:   |               |               |             |

| Specie          | Theory       | RECP                  | $E_{ion(+1)}$ | $E_{ion(+2)}$ | IE          |
|-----------------|--------------|-----------------------|---------------|---------------|-------------|
| Ba <sup>+</sup> | CCSD(T,Full) | Bausch. <i>et al.</i> | -25.133532    | -24.771889    | <b>9.84</b> |
|                 |              | SDD                   | -25.073281    | -24.715209    | <b>9.74</b> |
|                 |              | Lim <i>et al.</i>     | -25.187920    | -24.821722    | <b>9.96</b> |
|                 |              | Experimental value:   |               |               |             |

| Specie* | Theory   | RECP                  | $E_0^{**}$  | $E_{ion}^{**}$ | IE <sub>v</sub> <sup>**</sup> |
|---------|----------|-----------------------|-------------|----------------|-------------------------------|
| BaO     | mPW1PW91 | Bausch. <i>et al.</i> | -100.704981 | -100.462628    | <b>6.59</b>                   |
|         |          | SDD                   | -100.721548 | -100.481590    | <b>6.53</b>                   |
|         |          | Lim <i>et al.</i>     | -100.725587 | -100.484259    | <b>6.57</b>                   |
|         |          | Experimental value:   |             |                |                               |

| Specie* | Theory       | RECP                  | $E_0^{**}$  | $E_{ion}^{**}$ | IE <sub>v</sub> <sup>**</sup> |
|---------|--------------|-----------------------|-------------|----------------|-------------------------------|
| BaO     | CCSD(T,Full) | Bausch. <i>et al.</i> | -100.551570 | -100.305016    | <b>6.71</b>                   |
|         |              | SDD                   | -100.478041 | -100.237409    | <b>6.55</b>                   |
|         |              | Lim <i>et al.</i>     | -100.603934 | -100.354486    | <b>6.79</b>                   |
|         |              | Experimental value:   |             |                |                               |

\* Basis set used for O atom: AUG-cc-PVQZ

\*\* Note that the values are not corrected by the zero point vibrational energies ( $E_{ZPE}$ ).

The RECP developed by Lim *et al.* was selected for the accuracy to reproduce the experimental IE's of ground state Ba, Ba<sup>+</sup>, and the vertical IE of BaO, as compared with the corresponding experimental values.

## Water clusters:

### **(H<sub>2</sub>O)<sub>2</sub>:**

| Theory          | $E_0[(H_2O)_2]$ | $E_{ZPE}$ | $E[(H_2O)_2]$ | $E_0[(H_2O)_1]$ | $E_{ZPE}$ | $E[(H_2O)_1]$ | $D_e$        | $D_0$        | $D_0/1$      |
|-----------------|-----------------|-----------|---------------|-----------------|-----------|---------------|--------------|--------------|--------------|
| <b>mPW1PW91</b> | -152.878885     | 0.046923  | -152.831962   | -76.434787      | 0.021605  | -76.413183    | <b>-5.84</b> | <b>-3.51</b> | <b>-3.51</b> |

  

| Theory              | $E_0[(H_2O)_2]$ | $E_{ZPE}$ | $E[(H_2O)_2]$ | $E_0[(H_2O)_1]$ | $E_{ZPE}$ | $E[(H_2O)_1]$ | $D_e$        | $D_0$        | $D_0/1$      |
|---------------------|-----------------|-----------|---------------|-----------------|-----------|---------------|--------------|--------------|--------------|
| <b>CCSD(T,Full)</b> | -152.621294     | 0.046923  | -152.574371   | -76.305850      | 0.021605  | -76.284245    | <b>-6.02</b> | <b>-3.69</b> | <b>-3.69</b> |

### **(H<sub>2</sub>O)<sub>3</sub>:**

| Theory          | $E_0[(H_2O)_3]$ | $E_{ZPE}$ | $E[(H_2O)_3]$ | $E[(H_2O)_2]$ | $E[(H_2O)_1]$ | $D_e$         | $D_0$        | $D_0/2$      |
|-----------------|-----------------|-----------|---------------|---------------|---------------|---------------|--------------|--------------|
| <b>mPW1PW91</b> | -229.332098     | 0.074047  | -229.258051   | -152.831962   | -76.413183    | <b>-11.56</b> | <b>-8.10</b> | <b>-4.05</b> |

  

| Theory              | $E_0[(H_2O)_3]$ | $E_{ZPE}$ | $E[(H_2O)_3]$ | $E[(H_2O)_2]$ | $E[(H_2O)_1]$ | $D_e$         | $D_0$        | $D_0/2$      |
|---------------------|-----------------|-----------|---------------|---------------|---------------|---------------|--------------|--------------|
| <b>CCSD(T,Full)</b> | -228.945384     | 0.074047  | -228.871337   | -152.574371   | -76.284245    | <b>-11.45</b> | <b>-7.98</b> | <b>-3.99</b> |

### **(H<sub>2</sub>O)<sub>4</sub>:**

| Theory          | $E_0[(H_2O)_4]$ | $E_{ZPE}$ | $E[(H_2O)_4]$ | $E[(H_2O)_3]$ | $E[(H_2O)_1]$ | $D_e$         | $D_0$         | $D_0/2$      |
|-----------------|-----------------|-----------|---------------|---------------|---------------|---------------|---------------|--------------|
| <b>mPW1PW91</b> | -305.788599     | 0.100305  | -305.688295   | -229.258051   | -76.413183    | <b>-13.63</b> | <b>-10.71</b> | <b>-5.35</b> |

  

| Theory              | $E_0[(H_2O)_4]$ | $E_{ZPE}$ | $E[(H_2O)_4]$ | $E[(H_2O)_3]$ | $E[(H_2O)_1]$ | $D_e$         | $D_0$         | $D_0/2$      |
|---------------------|-----------------|-----------|---------------|---------------|---------------|---------------|---------------|--------------|
| <b>CCSD(T,Full)</b> | -305.272365     | 0.100305  | -305.172060   | -228.871337   | -76.284245    | <b>-13.26</b> | <b>-10.34</b> | <b>-5.17</b> |

## Neutral barium-water clusters:

### Ba(H<sub>2</sub>O)<sub>1</sub>: Isomer 1

| Theory                | Basis set Ba          | $E_0$       | $E_{ZPE}$ | $E[Ba(H_2O)_1]$ | $E[(H_2O)_1]$ | $E[Ba]$    | $\Delta E$    | $\Delta_r G^{75K}$ |
|-----------------------|-----------------------|-------------|-----------|-----------------|---------------|------------|---------------|--------------------|
| mPW1PW91              | Bausch. <i>et al.</i> | -101.875384 | 0.022055  | -101.853329     | -76.413183    | -25.421894 | <b>-11.45</b> | <b>-10.67</b>      |
|                       | SDD                   | -101.893920 | 0.022340  | -101.871580     | -76.413183    | -25.441871 | <b>-10.37</b> | <b>-9.52</b>       |
|                       | Lim <i>et al.</i>     | -101.898964 | 0.022009  | -101.876955     | -76.413183    | -25.445940 | <b>-11.19</b> | <b>-10.45</b>      |
| <b>Average value:</b> |                       |             |           |                 |               |            | <b>-11.00</b> | <b>-10.21</b>      |

| Theory                | Basis set Ba          | $E_0$       | $E_{ZPE}$ | $E[Ba(H_2O)_1]$ | $E[(H_2O)_1]$ | $E[Ba]$    | $\Delta E$    | $\Delta_r G^{75K}$ |
|-----------------------|-----------------------|-------------|-----------|-----------------|---------------|------------|---------------|--------------------|
| CCSD(T,Full)          | Bausch. <i>et al.</i> | -101.645290 | 0.022055  | -101.623235     | -76.284245    | -25.322073 | <b>-10.62</b> | <b>-9.83</b>       |
|                       | SDD                   | -101.565826 | 0.022340  | -101.543486     | -76.284245    | -25.258984 | <b>-0.16</b>  | <b>0.68</b>        |
|                       | Lim <i>et al.</i>     | -101.702281 | 0.022009  | -101.680272     | -76.284245    | -25.378212 | <b>-11.18</b> | <b>-10.44</b>      |
| <b>Average value:</b> |                       |             |           |                 |               |            | <b>-7.32</b>  | <b>-6.53</b>       |

| Theory                | Basis set Ba          | $E_0$       | $E_{ZPE}$ | $E_a$       | $E_{ZPE}^a$ | $E_v$       | $IE_v$      | $IE_a$      |
|-----------------------|-----------------------|-------------|-----------|-------------|-------------|-------------|-------------|-------------|
| mPW1PW91              | Bausch. <i>et al.</i> | -101.875384 | 0.022055  | -101.710805 | 0.023623    | -101.710805 | <b>4.52</b> | <b>4.52</b> |
|                       | SDD                   | -101.893920 | 0.022340  | -101.728590 | 0.023746    | -101.728589 | <b>4.54</b> | <b>4.54</b> |
|                       | Lim <i>et al.</i>     | -101.898964 | 0.022009  | -101.733396 | 0.023608    | -101.733396 | <b>4.55</b> | <b>4.55</b> |
| <b>Average value:</b> |                       |             |           |             |             |             | <b>4.54</b> | <b>4.54</b> |

| Theory                | Basis set Ba          | $E_0$       | $E_{ZPE}$ | $E_a$       | $E_{ZPE}^a$ | $E_v$       | $IE_v$      | $IE_a$      |
|-----------------------|-----------------------|-------------|-----------|-------------|-------------|-------------|-------------|-------------|
| CCSD(T,Full)          | Bausch. <i>et al.</i> | -101.645290 | 0.022055  | -101.477839 | 0.023623    | -101.477685 | <b>4.60</b> | <b>4.60</b> |
|                       | SDD                   | -101.565826 | 0.022340  | -101.401429 | 0.023746    | -101.401362 | <b>4.51</b> | <b>4.51</b> |
|                       | Lim <i>et al.</i>     | -101.702281 | 0.022009  | -101.533780 | 0.023608    | -101.533601 | <b>4.63</b> | <b>4.63</b> |
| <b>Average value:</b> |                       |             |           |             |             |             | <b>4.58</b> | <b>4.58</b> |

### Ba(H<sub>2</sub>O)<sub>2</sub>: Isomer (2+0)<sub>a</sub>

| Theory                | Basis set Ba          | $E_0$       | $E_{ZPE}$ | $E[Ba(H_2O)_2]$ | $E[(H_2O)_2]$ | $E[Ba]$    | $\Delta E$    | $\Delta_r G^{75K}$ |
|-----------------------|-----------------------|-------------|-----------|-----------------|---------------|------------|---------------|--------------------|
| mPW1PW91              | Bausch. <i>et al.</i> | -178.331004 | 0.045450  | -178.285554     | -152.831963   | -25.421894 | <b>-19.89</b> | <b>-18.51</b>      |
|                       | SDD                   | -178.349334 | 0.045389  | -178.303945     | -152.831963   | -25.441871 | <b>-18.89</b> | <b>-17.64</b>      |
|                       | Lim <i>et al.</i>     | -178.354136 | 0.045449  | -178.305910     | -152.831963   | -25.445939 | <b>-17.58</b> | <b>-17.93</b>      |
| <b>Average value:</b> |                       |             |           |                 |               |            | <b>-18.79</b> | <b>-17.98</b>      |

| Theory                | Basis set Ba          | $E_0$       | $E_{ZPE}$ | $E[Ba(H_2O)_2]$ | $E[(H_2O)_2]$ | $E[Ba]$    | $\Delta E$    | $\Delta_r G^{75K}$ |
|-----------------------|-----------------------|-------------|-----------|-----------------|---------------|------------|---------------|--------------------|
| CCSD(T,Full)          | Bausch. <i>et al.</i> | -177.971065 | 0.045450  | -177.925615     | -152.574371   | -25.322073 | <b>-18.31</b> | <b>-17.04</b>      |
|                       | SDD                   | -177.891204 | 0.045389  | -177.845815     | -152.574371   | -25.258984 | <b>-7.82</b>  | <b>-6.56</b>       |
|                       | Lim <i>et al.</i>     | -178.029627 | 0.045449  | -177.984178     | -152.574371   | -25.378212 | <b>-19.83</b> | <b>-18.56</b>      |
| <b>Average value:</b> |                       |             |           |                 |               |            | <b>-15.32</b> | <b>-14.05</b>      |

| Theory                | Basis set Ba          | $E_0$       | $E_{ZPE}$ | $E_a$       | $E_{ZPE}^a$ | $E_v$       | $IE_v$      | $IE_a$      |
|-----------------------|-----------------------|-------------|-----------|-------------|-------------|-------------|-------------|-------------|
| mPW1PW91              | Bausch. <i>et al.</i> | -178.331004 | 0.045450  | -178.181194 | 0.047583    | -178.178086 | <b>4.22</b> | <b>4.13</b> |
|                       | SDD                   | -178.349334 | 0.045389  | -178.199286 | 0.047775    | -178.198117 | <b>4.18</b> | <b>4.15</b> |
|                       | Lim <i>et al.</i>     | -178.354136 | 0.045449  | -178.203782 | 0.047550    | -178.200782 | <b>4.15</b> | <b>4.07</b> |
| <b>Average value:</b> |                       |             |           |             |             |             | <b>4.18</b> | <b>4.12</b> |

| Theory                | Basis set Ba          | $E_0$       | $E_{ZPE}$ | $E_a$       | $E_{ZPE}^a$ | $E_v$       | $IE_v$      | $IE_a$      |
|-----------------------|-----------------------|-------------|-----------|-------------|-------------|-------------|-------------|-------------|
| CCSD(T,Full)          | Bausch. <i>et al.</i> | -177.971065 | 0.045450  | -177.818834 | 0.047583    | -177.816647 | <b>4.26</b> | <b>4.20</b> |
|                       | SDD                   | -177.891204 | 0.045389  | -177.740975 | 0.047775    | -177.740967 | <b>4.15</b> | <b>4.15</b> |
|                       | Lim <i>et al.</i>     | -178.029627 | 0.045449  | -177.875773 | 0.047550    | -177.874537 | <b>4.28</b> | <b>4.24</b> |
| <b>Average value:</b> |                       |             |           |             |             |             | <b>4.23</b> | <b>4.20</b> |

### Ba(H<sub>2</sub>O)<sub>2</sub>: Isomer (2+0)<sub>b</sub>

| Theory          | Basis set Ba          | $E_0$       | $E_{ZPE}$ | $E[Ba(H_2O)_2]$ | $E[(H_2O)_2]$ | $E[Ba]$    | $\Delta E$    | $\Delta_r G^{75K}$ |
|-----------------|-----------------------|-------------|-----------|-----------------|---------------|------------|---------------|--------------------|
| <i>mPW1PW91</i> | Bausch. <i>et al.</i> | -178.328559 | 0.046694  | -178.281865     | -152.831963   | -25.421894 | <b>-17.58</b> | <b>-16.19</b>      |
|                 | SDD                   | -178.346744 | 0.046889  | -178.299855     | -152.831963   | -25.441871 | <b>-16.33</b> | <b>-14.93</b>      |
|                 | Lim <i>et al.</i>     | -178.351660 | 0.046672  | -178.304988     | -152.831963   | -25.445939 | <b>-17.00</b> | <b>-15.62</b>      |
| Average value:  |                       |             |           |                 |               |            | <b>-16.97</b> | <b>-15.58</b>      |

| Theory         | Basis set Ba          | $E_0$       | $E_{ZPE}$ | $E[Ba(H_2O)_2]$ | $E[(H_2O)_2]$ | $E[Ba]$    | $\Delta E$    | $\Delta_r G^{75K}$ |
|----------------|-----------------------|-------------|-----------|-----------------|---------------|------------|---------------|--------------------|
| CCSD(T,Full)   | Bausch. <i>et al.</i> | -177.969827 | 0.046694  | -177.923133     | -152.574371   | -25.322073 | <b>-16.75</b> | <b>-15.36</b>      |
|                | SDD                   | -177.889845 | 0.046889  | -177.842956     | -152.574371   | -25.258984 | <b>-6.02</b>  | <b>-4.63</b>       |
|                | Lim <i>et al.</i>     | -178.027492 | 0.046672  | -177.980820     | -152.574371   | -25.378212 | <b>-17.72</b> | <b>-16.35</b>      |
| Average value: |                       |             |           |                 |               |            | <b>-13.50</b> | <b>-12.11</b>      |

| Theory          | Basis set Ba          | $E_0$       | $E_{ZPE}$ | $E_a$       | $E_{ZPE}^a$ | $E_v$       | $IE_v$      | $IE_a$      |
|-----------------|-----------------------|-------------|-----------|-------------|-------------|-------------|-------------|-------------|
| <i>mPW1PW91</i> | Bausch. <i>et al.</i> | -178.328559 | 0.046694  | -178.181194 | 0.047583    | -178.174189 | <b>4.22</b> | <b>4.03</b> |
|                 | SDD                   | -178.346744 | 0.046889  | -178.199286 | 0.047775    | -178.191916 | <b>4.24</b> | <b>4.04</b> |
|                 | Lim <i>et al.</i>     | -178.351660 | 0.046672  | -178.203782 | 0.047550    | -178.196471 | <b>4.25</b> | <b>4.05</b> |
| Average value:  |                       |             |           |             |             |             | <b>4.24</b> | <b>4.04</b> |

| Theory         | Basis set Ba          | $E_0$       | $E_{ZPE}$ | $E_a$       | $E_{ZPE}^a$ | $E_v$       | $IE_v$      | $IE_a$      |
|----------------|-----------------------|-------------|-----------|-------------|-------------|-------------|-------------|-------------|
| CCSD(T,Full)   | Bausch. <i>et al.</i> | -177.969827 | 0.046694  | -177.818834 | 0.047583    | -177.813138 | <b>4.29</b> | <b>4.13</b> |
|                | SDD                   | -177.889845 | 0.046889  | -177.740975 | 0.047775    | -177.735120 | <b>4.23</b> | <b>4.08</b> |
|                | Lim <i>et al.</i>     | -178.027492 | 0.046672  | -177.875773 | 0.047550    | -177.869896 | <b>4.31</b> | <b>4.15</b> |
| Average value: |                       |             |           |             |             |             | <b>4.28</b> | <b>4.12</b> |

### Ba(H<sub>2</sub>O)<sub>2</sub>: Isomer (1+1)

| Theory          | Basis set Ba          | $E_0$       | $E_{ZPE}$ | $E[Ba(H_2O)_2]$ | $E[(H_2O)_2]$ | $E[Ba]$    | $\Delta E$    | $\Delta_r G^{75K}$ |
|-----------------|-----------------------|-------------|-----------|-----------------|---------------|------------|---------------|--------------------|
| <i>mPW1PW91</i> | Bausch. <i>et al.</i> | -178.326657 | 0.048027  | -178.278630     | -152.831963   | -25.421894 | <b>-15.55</b> | <b>-14.24</b>      |
|                 | SDD                   | -178.344897 | 0.048226  | -178.296671     | -152.831963   | -25.441871 | <b>-14.33</b> | <b>-13.07</b>      |
|                 | Lim <i>et al.</i>     | -178.349990 | 0.048029  | -178.301961     | -152.831963   | -25.445939 | <b>-15.10</b> | <b>-13.84</b>      |
| Average value:  |                       |             |           |                 |               |            | <b>-14.99</b> | <b>-13.73</b>      |

| Theory         | Basis set Ba          | $E_0$       | $E_{ZPE}$ | $E[Ba(H_2O)_2]$ | $E[(H_2O)_2]$ | $E[Ba]$    | $\Delta E$    | $\Delta_r G^{75K}$ |
|----------------|-----------------------|-------------|-----------|-----------------|---------------|------------|---------------|--------------------|
| CCSD(T,Full)   | Bausch. <i>et al.</i> | -177.967008 | 0.048027  | -177.918981     | -152.574371   | -25.322073 | <b>-14.14</b> | <b>-12.84</b>      |
|                | SDD                   | -177.887456 | 0.048226  | -177.839230     | -152.574371   | -25.258984 | <b>-3.69</b>  | <b>-2.38</b>       |
|                | Lim <i>et al.</i>     | -178.023989 | 0.048029  | -177.975960     | -152.574371   | -25.378212 | <b>-14.67</b> | <b>-13.37</b>      |
| Average value: |                       |             |           |                 |               |            | <b>-10.83</b> | <b>-9.53</b>       |

| Theory          | Basis set Ba          | $E_0$       | $E_{ZPE}$ | $E_a$       | $E_{ZPE}^a$ | $E_v$       | $IE_v$      | $IE_a$      |
|-----------------|-----------------------|-------------|-----------|-------------|-------------|-------------|-------------|-------------|
| <i>mPW1PW91</i> | Bausch. <i>et al.</i> | -178.326657 | 0.048027  | -178.172484 | 0.048990    | -178.166128 | <b>4.39</b> | <b>4.22</b> |
|                 | SDD                   | -178.344897 | 0.048226  | -178.190300 | 0.049047    | -178.183748 | <b>4.41</b> | <b>4.23</b> |
|                 | Lim <i>et al.</i>     | -178.349990 | 0.048029  | -178.195104 | 0.048972    | -178.188478 | <b>4.42</b> | <b>4.24</b> |
| Average value:  |                       |             |           |             |             |             | <b>4.41</b> | <b>4.23</b> |

| Theory         | Basis set Ba          | $E_0$       | $E_{ZPE}$ | $E_a$       | $E_{ZPE}^a$ | $E_v$       | $IE_v$      | $IE_a$      |
|----------------|-----------------------|-------------|-----------|-------------|-------------|-------------|-------------|-------------|
| CCSD(T,Full)   | Bausch. <i>et al.</i> | -177.967008 | 0.048027  | -177.810139 | 0.048990    | -177.803443 | <b>4.48</b> | <b>4.29</b> |
|                | SDD                   | -177.887456 | 0.048226  | -177.733171 | 0.049047    | -177.726796 | <b>4.39</b> | <b>4.22</b> |
|                | Lim <i>et al.</i>     | -178.023989 | 0.048029  | -177.866257 | 0.048972    | -177.859389 | <b>4.50</b> | <b>4.32</b> |
| Average value: |                       |             |           |             |             |             | <b>4.46</b> | <b>4.28</b> |

### Ba(H<sub>2</sub>O)<sub>3</sub>: Isomer (3+0)<sub>a</sub>

| Theory          | Basis set Ba          | $E_0$       | $E_{ZPE}$ | $E[Ba(H_2O)_3]$ | $E[(H_2O)_3]$ | $E[Ba]$     | $\Delta E$    |             |
|-----------------|-----------------------|-------------|-----------|-----------------|---------------|-------------|---------------|-------------|
| <i>mPW1PW91</i> | Bausch. <i>et al.</i> | -254.784611 | 0.069870  | -254.714741     | -229.258051   | -25.421894  | <b>-21.83</b> |             |
|                 | SDD                   | -254.802565 | 0.069914  | -254.732651     | -229.258051   | -25.441871  | <b>-20.54</b> |             |
|                 | Lim <i>et al.</i>     | -254.807362 | 0.069875  | -254.737487     | -229.258051   | -25.445939  | <b>-21.02</b> |             |
| Average value:  |                       |             |           |                 |               |             | <b>-21.13</b> |             |
| Theory          | Basis set Ba          | $E_0$       | $E_{ZPE}$ | $E[Ba(H_2O)_3]$ | $E[(H_2O)_3]$ | $E[Ba]$     | $\Delta E$    |             |
| CCSD(T,Full)    | Bausch. <i>et al.</i> | -254.296516 | 0.069870  | -254.226646     | -228.871337   | -25.322073  | <b>-20.86</b> |             |
|                 | SDD                   | -254.216262 | 0.069914  | -254.146348     | -228.871337   | -25.258984  | <b>-10.06</b> |             |
|                 | Lim <i>et al.</i>     | -254.355763 | 0.069875  | -254.285888     | -228.871337   | -25.378212  | <b>-22.80</b> |             |
| Average value:  |                       |             |           |                 |               |             | <b>-17.91</b> |             |
| Theory          | Basis set Ba          | $E_0$       | $E_{ZPE}$ | $E_a$           | $E_{ZPE}^a$   | $E_v$       | $IE_v$        | $IE_a$      |
| <i>mPW1PW91</i> | Bausch. <i>et al.</i> | -254.784611 | 0.069870  | -254.647647     | 0.071256      | -254.637794 | <b>4.03</b>   | <b>3.76</b> |
|                 | SDD                   | -254.802565 | 0.069914  | -254.666178     | 0.071554      | -254.657215 | <b>4.00</b>   | <b>3.76</b> |
|                 | Lim <i>et al.</i>     | -254.807362 | 0.069875  | -254.670312     | 0.071253      | -254.660438 | <b>4.04</b>   | <b>3.77</b> |
| Average value:  |                       |             |           |                 |               |             | <b>4.02</b>   | <b>3.76</b> |
| Theory          | Basis set Ba          | $E_0$       | $E_{ZPE}$ | $E_a$           | $E_{ZPE}^a$   | $E_v$       | $IE_v$        | $IE_a$      |
| CCSD(T,Full)    | Bausch. <i>et al.</i> | -254.296516 | 0.069870  | -254.156681     | 0.071256      | -254.148800 | <b>4.06</b>   | <b>3.84</b> |
|                 | SDD                   | -254.216262 | 0.069914  | -254.077773     | 0.071554      | -254.071725 | <b>3.98</b>   | <b>3.81</b> |
|                 | Lim <i>et al.</i>     | -254.355763 | 0.069875  | -254.214468     | 0.071253      | -254.207698 | <b>4.07</b>   | <b>3.88</b> |
| Average value:  |                       |             |           |                 |               |             | <b>4.03</b>   | <b>3.85</b> |

### Ba(H<sub>2</sub>O)<sub>3</sub>: Isomer (3+0)<sub>b</sub>

| Theory          | Basis set Ba          | $E_0$       | $E_{ZPE}$ | $E[Ba(H_2O)_3]$ | $E[(H_2O)_3]$ | $E[Ba]$     | $\Delta E$    |             |
|-----------------|-----------------------|-------------|-----------|-----------------|---------------|-------------|---------------|-------------|
| <i>mPW1PW91</i> | Bausch. <i>et al.</i> | -254.780616 | 0.071704  | -254.708912     | -229.258051   | -25.421894  | <b>-18.18</b> |             |
|                 | SDD                   | -254.798529 | 0.071965  | -254.726564     | -229.258051   | -25.441871  | <b>-16.72</b> |             |
|                 | Lim <i>et al.</i>     | -254.803367 | 0.071576  | -254.731791     | -229.258051   | -25.445939  | <b>-17.45</b> |             |
| Average value:  |                       |             |           |                 |               |             | <b>-17.45</b> |             |
| Theory          | Basis set Ba          | $E_0$       | $E_{ZPE}$ | $E[Ba(H_2O)_3]$ | $E[(H_2O)_3]$ | $E[Ba]$     | $\Delta E$    |             |
| CCSD(T,Full)    | Bausch. <i>et al.</i> | -254.295339 | 0.071704  | -254.223635     | -228.871337   | -25.322073  | <b>-18.97</b> |             |
|                 | SDD                   | -254.215329 | 0.071965  | -254.143364     | -228.871337   | -25.258984  | <b>-8.18</b>  |             |
|                 | Lim <i>et al.</i>     | -254.354288 | 0.071576  | -254.282712     | -228.871337   | -25.378212  | <b>-20.81</b> |             |
| Average value:  |                       |             |           |                 |               |             | <b>-15.99</b> |             |
| Theory          | Basis set Ba          | $E_0$       | $E_{ZPE}$ | $E_a$           | $E_{ZPE}^a$   | $E_v$       | $IE_v$        | $IE_a$      |
| <i>mPW1PW91</i> | Bausch. <i>et al.</i> | -254.780616 | 0.071704  | -254.647647     | 0.071256      | -254.633435 | <b>3.99</b>   | <b>3.61</b> |
|                 | SDD                   | -254.798529 | 0.071965  | -254.666178     | 0.071554      | -254.651989 | <b>3.98</b>   | <b>3.59</b> |
|                 | Lim <i>et al.</i>     | -254.803367 | 0.071576  | -254.670312     | 0.071253      | -254.656164 | <b>4.00</b>   | <b>3.61</b> |
| Average value:  |                       |             |           |                 |               |             | <b>3.99</b>   | <b>3.60</b> |
| Theory          | Basis set Ba          | $E_0$       | $E_{ZPE}$ | $E_a$           | $E_{ZPE}^a$   | $E_v$       | $IE_v$        | $IE_a$      |
| CCSD(T,Full)    | Bausch. <i>et al.</i> | -254.295339 | 0.071704  | -254.156681     | 0.071256      | -254.146836 | <b>4.03</b>   | <b>3.76</b> |
|                 | SDD                   | -254.215329 | 0.071965  | -254.077773     | 0.071554      | -254.068925 | <b>3.97</b>   | <b>3.73</b> |
|                 | Lim <i>et al.</i>     | -254.354288 | 0.071576  | -254.214468     | 0.071253      | -254.205461 | <b>4.04</b>   | <b>3.80</b> |
| Average value:  |                       |             |           |                 |               |             | <b>4.01</b>   | <b>3.76</b> |

### Ba(H<sub>2</sub>O)<sub>3</sub>: Isomer (2+1)

| Theory          | Basis set Ba          | $E_0$       | $E_{ZPE}$ | $E[Ba(H_2O)_3]$ | $E[(H_2O)_3]$ | $E[Ba]$     | $\Delta E$    |             |
|-----------------|-----------------------|-------------|-----------|-----------------|---------------|-------------|---------------|-------------|
| <i>mPW1PW91</i> | Bausch. <i>et al.</i> | -254.779201 | 0.072033  | -254.707168     | -229.258051   | -25.421894  | <b>-17.08</b> |             |
|                 | SDD                   | -254.796937 | 0.071874  | -254.725063     | -229.258051   | -25.441871  | <b>-15.78</b> |             |
|                 | Lim <i>et al.</i>     | -254.802334 | 0.072066  | -254.730268     | -229.258051   | -25.445939  | <b>-16.49</b> |             |
| Average value:  |                       |             |           |                 |               |             | <b>-16.45</b> |             |
| Theory          | Basis set Ba          | $E_0$       | $E_{ZPE}$ | $E[Ba(H_2O)_3]$ | $E[(H_2O)_3]$ | $E[Ba]$     | $\Delta E$    |             |
| CCSD(T,ull)     | Bausch. <i>et al.</i> | -254.291689 | 0.072033  | -254.219656     | -228.871337   | -25.322073  | <b>-16.47</b> |             |
|                 | SDD                   | -254.211514 | 0.071874  | -254.139640     | -228.871337   | -25.258984  | <b>-5.85</b>  |             |
|                 | Lim <i>et al.</i>     | -254.350004 | 0.072066  | -254.277938     | -228.871337   | -25.378212  | <b>-17.81</b> |             |
| Average value:  |                       |             |           |                 |               |             | <b>-13.38</b> |             |
| Theory          | Basis set Ba          | $E_0$       | $E_{ZPE}$ | $E_a$           | $E_{ZPE}^a$   | $E_v$       | $IE_v$        | $IE_a$      |
| <i>mPW1PW91</i> | Bausch. <i>et al.</i> | -254.779201 | 0.072033  | -254.639968     | 0.074516      | -254.631580 | <b>4.08</b>   | <b>3.86</b> |
|                 | SDD                   | -254.796937 | 0.071874  | -254.658154     | 0.074790      | -254.650314 | <b>4.07</b>   | <b>3.86</b> |
|                 | Lim <i>et al.</i>     | -254.802334 | 0.072066  | -254.662580     | 0.074535      | -254.654016 | <b>4.10</b>   | <b>3.87</b> |
| Average value:  |                       |             |           |                 |               |             | <b>4.09</b>   | <b>3.86</b> |
| Theory          | Basis set Ba          | $E_0$       | $E_{ZPE}$ | $E_a$           | $E_{ZPE}^a$   | $E_v$       | $IE_v$        | $IE_a$      |
| CCSD(T,Full)    | Bausch. <i>et al.</i> | -254.291689 | 0.072033  | -254.151178     | 0.074516      | -254.141097 | <b>4.17</b>   | <b>3.89</b> |
|                 | SDD                   | -254.211514 | 0.071874  | -254.073139     | 0.074790      | -254.064096 | <b>4.09</b>   | <b>3.84</b> |
|                 | Lim <i>et al.</i>     | -254.350004 | 0.072066  | -254.208109     | 0.074535      | -254.198769 | <b>4.18</b>   | <b>3.93</b> |
| Average value:  |                       |             |           |                 |               |             | <b>4.15</b>   | <b>3.89</b> |

### Ba(H<sub>2</sub>O)<sub>3</sub>: Isomer (1+1+1)

| Theory          | Basis set Ba          | $E_0$       | $E_{ZPE}$ | $E[Ba(H_2O)_3]$ | $E[(H_2O)_3]$ | $E[Ba]$     | $\Delta E$    |             |
|-----------------|-----------------------|-------------|-----------|-----------------|---------------|-------------|---------------|-------------|
| <i>mPW1PW91</i> | Bausch. <i>et al.</i> | -254.779461 | 0.073330  | -254.706131     | -229.258051   | -25.421894  | <b>-16.43</b> |             |
|                 | SDD                   | -254.797597 | 0.073518  | -254.724079     | -229.258051   | -25.441871  | <b>-15.16</b> |             |
|                 | Lim <i>et al.</i>     | -254.802788 | 0.073360  | -254.729428     | -229.258051   | -25.445939  | <b>-15.96</b> |             |
| Average value:  |                       |             |           |                 |               |             | <b>-15.85</b> |             |
| Theory          | Basis set Ba          | $E_0$       | $E_{ZPE}$ | $E[Ba(H_2O)_3]$ | $E[(H_2O)_3]$ | $E[Ba]$     | $\Delta E$    |             |
| CCSD(T,Full)    | Bausch. <i>et al.</i> | -254.290498 | 0.073330  | -254.217168     | -228.871337   | -25.322073  | <b>-14.91</b> |             |
|                 | SDD                   | -254.210417 | 0.073518  | -254.136899     | -228.871337   | -25.258984  | <b>-4.13</b>  |             |
|                 | Lim <i>et al.</i>     | -254.347480 | 0.073360  | -254.274120     | -228.871337   | -25.378212  | <b>-15.42</b> |             |
| Average value:  |                       |             |           |                 |               |             | <b>-11.48</b> |             |
| Theory          | Basis set Ba          | $E_0$       | $E_{ZPE}$ | $E_a$           | $E_{ZPE}^a$   | $E_v$       | $IE_v$        | $IE_a$      |
| <i>mPW1PW91</i> | Bausch. <i>et al.</i> | -254.779461 | 0.073330  | -254.628024     | 0.073661      | -254.617845 | <b>4.41</b>   | <b>4.13</b> |
|                 | SDD                   | -254.797597 | 0.073518  | -254.645922     | 0.073851      | -254.634803 | <b>4.44</b>   | <b>4.14</b> |
|                 | Lim <i>et al.</i>     | -254.802788 | 0.073360  | -254.650715     | 0.073699      | -254.640029 | <b>4.44</b>   | <b>4.15</b> |
| Average value:  |                       |             |           |                 |               |             | <b>4.43</b>   | <b>4.14</b> |
| Theory          | Basis set Ba          | $E_0$       | $E_{ZPE}$ | $E_a$           | $E_{ZPE}^a$   | $E_v$       | $IE_v$        | $IE_a$      |
| CCSD(T,Full)    | Bausch. <i>et al.</i> | -254.290498 | 0.073330  | -254.136138     | 0.073661      | -254.124850 | <b>4.52</b>   | <b>4.21</b> |
|                 | SDD                   | -254.210417 | 0.073518  | -254.059150     | 0.073851      | -254.047392 | <b>4.45</b>   | <b>4.13</b> |
|                 | Lim <i>et al.</i>     | -254.347480 | 0.073360  | -254.192495     | 0.073699      | -254.180691 | <b>4.55</b>   | <b>4.23</b> |
| Average value:  |                       |             |           |                 |               |             | <b>4.50</b>   | <b>4.19</b> |



### Ba(H<sub>2</sub>O)<sub>4</sub>: Isomer (4+0)<sub>a</sub>

| Theory          | Basis set Ba          | $E_0$       | $E_{ZPE}$ | $E[Ba(H_2O)_4]$ | $E[(H_2O)_4]$ | $E[Ba]$     | $\Delta E$    |             |
|-----------------|-----------------------|-------------|-----------|-----------------|---------------|-------------|---------------|-------------|
| <i>mPW1PW91</i> | Bausch. <i>et al.</i> | -331.239428 | 0.094029  | -331.145399     | -305.688295   | -25.421894  | <b>-22.09</b> |             |
|                 | SDD                   | -331.257195 | 0.094541  | -331.162654     | -305.688295   | -25.441871  | <b>-20.39</b> |             |
|                 | Lim <i>et al.</i>     | -331.261792 | 0.093975  | -331.167817     | -305.688295   | -25.445939  | <b>-21.07</b> |             |
| Average value:  |                       |             |           |                 |               |             | <b>-21.19</b> |             |
| Theory          | Basis set Ba          | $E_0$       | $E_{ZPE}$ | $E[Ba(H_2O)_4]$ | $E[(H_2O)_4]$ | $E[Ba]$     | $\Delta E$    |             |
| CCSD(T,Full)    | Bausch. <i>et al.</i> | -330.623683 | 0.094029  | -330.529654     | -305.172060   | -25.322073  | <b>-22.29</b> |             |
|                 | SDD                   | -330.542879 | 0.094541  | -330.448338     | -305.172060   | -25.258984  | <b>-10.85</b> |             |
|                 | Lim <i>et al.</i>     | -330.682883 | 0.093975  | -330.588908     | -305.172060   | -25.378212  | <b>-24.24</b> |             |
| Average value:  |                       |             |           |                 |               |             | <b>-19.13</b> |             |
| Theory          | Basis set Ba          | $E_0$       | $E_{ZPE}$ | $E_a$           | $E_{ZPE}^a$   | $E_v$       | $IE_v$        | $IE_a$      |
| <i>mPW1PW91</i> | Bausch. <i>et al.</i> | -331.239428 | 0.094029  | -331.107980     | 0.094301      | -331.098366 | <b>3.85</b>   | <b>3.58</b> |
|                 | SDD                   | -331.257195 | 0.094541  | -331.126638     | 0.094529      | -331.116814 | <b>3.82</b>   | <b>3.55</b> |
|                 | Lim <i>et al.</i>     | -331.261792 | 0.093975  | -331.130648     | 0.094304      | -331.120513 | <b>3.85</b>   | <b>3.58</b> |
| Average value:  |                       |             |           |                 |               |             | <b>3.84</b>   | <b>3.57</b> |
| Theory          | Basis set Ba          | $E_0$       | $E_{ZPE}$ | $E_a$           | $E_{ZPE}^a$   | $E_v$       | $IE_v$        | $IE_a$      |
| CCSD(T,Full)    | Bausch. <i>et al.</i> | -330.623683 | 0.094029  | -330.490068     | 0.094301      | -330.481882 | <b>3.87</b>   | <b>3.64</b> |
|                 | SDD                   | -330.542879 | 0.094541  | -330.412556     | 0.094529      | -330.403396 | <b>3.80</b>   | <b>3.55</b> |
|                 | Lim <i>et al.</i>     | -330.682883 | 0.093975  | -330.549527     | 0.094304      | -330.540675 | <b>3.88</b>   | <b>3.64</b> |
| Average value:  |                       |             |           |                 |               |             | <b>3.85</b>   | <b>3.61</b> |

### Ba(H<sub>2</sub>O)<sub>4</sub>: Isomer (4+0)<sub>b</sub>

| Theory          | Basis set Ba          | $E_0$       | $E_{ZPE}$ | $E[Ba(H_2O)_4]$ | $E[(H_2O)_4]$ | $E[Ba]$     | $\Delta E$    |             |
|-----------------|-----------------------|-------------|-----------|-----------------|---------------|-------------|---------------|-------------|
| <i>mPW1PW91</i> | Bausch. <i>et al.</i> | -331.236234 | 0.094422  | -331.141812     | -305.688295   | -25.421894  | <b>-19.84</b> |             |
|                 | SDD                   | -331.254094 | 0.094788  | -331.159306     | -305.688295   | -25.441871  | <b>-18.29</b> |             |
|                 | Lim <i>et al.</i>     | -331.258707 | 0.094684  | -331.164023     | -305.688295   | -25.445939  | <b>-18.69</b> |             |
| Average value:  |                       |             |           |                 |               |             | <b>-18.94</b> |             |
| Theory          | Basis set Ba          | $E_0$       | $E_{ZPE}$ | $E[Ba(H_2O)_4]$ | $E[(H_2O)_4]$ | $E[Ba]$     | $\Delta E$    |             |
| CCSD(T,Full)    | Bausch. <i>et al.</i> | -330.622409 | 0.094422  | -330.527987     | -305.172060   | -25.322073  | <b>-21.24</b> |             |
|                 | SDD                   | -330.542019 | 0.094788  | -330.447231     | -305.172060   | -25.258984  | <b>-10.16</b> |             |
|                 | Lim <i>et al.</i>     | -330.682413 | 0.094684  | -330.587729     | -305.172060   | -25.378212  | <b>-23.50</b> |             |
| Average value:  |                       |             |           |                 |               |             | <b>-18.30</b> |             |
| Theory          | Basis set Ba          | $E_0$       | $E_{ZPE}$ | $E_a$           | $E_{ZPE}^a$   | $E_v$       | $IE_v$        | $IE_a$      |
| <i>mPW1PW91</i> | Bausch. <i>et al.</i> | -331.236234 | 0.094422  | -331.107980     | 0.094301      | -331.097515 | <b>3.77</b>   | <b>3.49</b> |
|                 | SDD                   | -331.254094 | 0.094788  | -331.126638     | 0.094529      | -331.116517 | <b>3.74</b>   | <b>3.46</b> |
|                 | Lim <i>et al.</i>     | -331.258707 | 0.094684  | -331.130648     | 0.094304      | -331.119889 | <b>3.77</b>   | <b>3.47</b> |
| Average value:  |                       |             |           |                 |               |             | <b>3.76</b>   | <b>3.47</b> |
| Theory          | Basis set Ba          | $E_0$       | $E_{ZPE}$ | $E_a$           | $E_{ZPE}^a$   | $E_v$       | $IE_v$        | $IE_a$      |
| CCSD(T,Full)    | Bausch. <i>et al.</i> | -330.622409 | 0.094422  | -330.490068     | 0.094301      | -330.483870 | <b>3.77</b>   | <b>3.60</b> |
|                 | SDD                   | -330.542019 | 0.094788  | -330.412556     | 0.094529      | -330.405620 | <b>3.70</b>   | <b>3.52</b> |
|                 | Lim <i>et al.</i>     | -330.682413 | 0.094684  | -330.549527     | 0.094304      | -330.543490 | <b>3.77</b>   | <b>3.61</b> |
| Average value:  |                       |             |           |                 |               |             | <b>3.75</b>   | <b>3.57</b> |

### Ba(H<sub>2</sub>O)<sub>4</sub>: Isomer (3+1)<sub>a</sub>

| Theory          | Basis set Ba          | $E_0$       | $E_{ZPE}$ | $E[Ba(H_2O)_4]$ | $E[(H_2O)_4]$ | $E[Ba]$     | $\Delta E$    |             |
|-----------------|-----------------------|-------------|-----------|-----------------|---------------|-------------|---------------|-------------|
| <i>mPW1PW91</i> | Bausch. <i>et al.</i> | -331.235734 | 0.095020  | -331.140714     | -305.688295   | -25.421894  | <b>-19.15</b> |             |
|                 | SDD                   | -331.253213 | 0.094681  | -331.158532     | -305.688295   | -25.441871  | <b>-17.80</b> |             |
|                 | Lim <i>et al.</i>     | -331.258474 | 0.094860  | -331.158720     | -305.688295   | -25.445939  | <b>-15.37</b> |             |
| Average value:  |                       |             |           |                 |               |             | <b>-17.44</b> |             |
| Theory          | Basis set Ba          | $E_0$       | $E_{ZPE}$ | $E[Ba(H_2O)_4]$ | $E[(H_2O)_4]$ | $E[Ba]$     | $\Delta E$    |             |
| CCSD(T,Full)    | Bausch. <i>et al.</i> | -330.618458 | 0.095020  | -330.523438     | -305.172060   | -25.322073  | <b>-18.39</b> |             |
|                 | SDD                   | -330.537651 | 0.094681  | -330.442970     | -305.172060   | -25.258984  | <b>-7.48</b>  |             |
|                 | Lim <i>et al.</i>     | -330.677921 | 0.094860  | -330.580128     | -305.172060   | -25.378212  | <b>-18.73</b> |             |
| Average value:  |                       |             |           |                 |               |             | <b>-14.87</b> |             |
| Theory          | Basis set Ba          | $E_0$       | $E_{ZPE}$ | $E_a$           | $E_{ZPE}^a$   | $E_v$       | $IE_v$        | $IE_a$      |
| <i>mPW1PW91</i> | Bausch. <i>et al.</i> | -331.235734 | 0.095020  | -331.105578     | 0.097963      | -331.094837 | <b>3.91</b>   | <b>3.62</b> |
|                 | SDD                   | -331.253213 | 0.094681  | -331.124040     | 0.098176      | -331.115979 | <b>3.83</b>   | <b>3.61</b> |
|                 | Lim <i>et al.</i>     | -331.258474 | 0.094860  | -331.128157     | 0.097947      | -331.117698 | <b>3.78</b>   | <b>3.50</b> |
| Average value:  |                       |             |           |                 |               |             | <b>3.84</b>   | <b>3.58</b> |
| Theory          | Basis set Ba          | $E_0$       | $E_{ZPE}$ | $E_a$           | $E_{ZPE}^a$   | $E_v$       | $IE_v$        | $IE_a$      |
| CCSD(T,Full)    | Bausch. <i>et al.</i> | -330.618458 | 0.095020  | -330.488888     | 0.097963      | -330.475472 | <b>3.97</b>   | <b>3.61</b> |
|                 | SDD                   | -330.537651 | 0.094681  | -330.410619     | 0.098176      | -330.391428 | <b>4.07</b>   | <b>3.55</b> |
|                 | Lim <i>et al.</i>     | -330.677921 | 0.094860  | -330.546817     | 0.097947      | -330.535006 | <b>3.89</b>   | <b>3.57</b> |
| Average value:  |                       |             |           |                 |               |             | <b>3.98</b>   | <b>3.58</b> |

### Ba(H<sub>2</sub>O)<sub>4</sub>: Isomer (3+1)<sub>b</sub>

| Theory          | Basis set Ba          | $E_0$       | $E_{ZPE}$ | $E[Ba(H_2O)_4]$ | $E[(H_2O)_4]$ | $E[Ba]$     | $\Delta E$    |             |
|-----------------|-----------------------|-------------|-----------|-----------------|---------------|-------------|---------------|-------------|
| <i>mPW1PW91</i> | Bausch. <i>et al.</i> | -331.230934 | 0.097133  | -331.135914     | -305.688295   | -25.421894  | <b>-16.14</b> |             |
|                 | SDD                   | -331.248629 | 0.097510  | -331.153948     | -305.688295   | -25.441871  | <b>-14.92</b> |             |
|                 | Lim <i>et al.</i>     | -331.253580 | 0.097010  | -331.158720     | -305.688295   | -25.445939  | <b>-15.37</b> |             |
| Average value:  |                       |             |           |                 |               |             | <b>-15.48</b> |             |
| Theory          | Basis set Ba          | $E_0$       | $E_{ZPE}$ | $E[Ba(H_2O)_4]$ | $E[(H_2O)_4]$ | $E[Ba]$     | $\Delta E$    |             |
| CCSD(T,Full)    | Bausch. <i>et al.</i> | -330.616439 | 0.097133  | -330.521419     | -305.172060   | -25.322073  | <b>-17.12</b> |             |
|                 | SDD                   | -330.536540 | 0.097510  | -330.441859     | -305.172060   | -25.258984  | <b>-6.79</b>  |             |
|                 | Lim <i>et al.</i>     | -330.674988 | 0.097010  | -330.580128     | -305.172060   | -25.378212  | <b>-18.73</b> |             |
| Average value:  |                       |             |           |                 |               |             | <b>-14.21</b> |             |
| Theory          | Basis set Ba          | $E_0$       | $E_{ZPE}$ | $E_a$           | $E_{ZPE}^a$   | $E_v$       | $IE_v$        | $IE_a$      |
| <i>mPW1PW91</i> | Bausch. <i>et al.</i> | -331.230934 | 0.097133  | -331.104664     | 0.095992      | -331.085037 | <b>4.00</b>   | <b>3.46</b> |
|                 | SDD                   | -331.248629 | 0.097510  | -331.123153     | 0.096374      | -331.103458 | <b>4.00</b>   | <b>3.46</b> |
|                 | Lim <i>et al.</i>     | -331.253580 | 0.097010  | -331.127276     | 0.096055      | -331.107344 | <b>4.01</b>   | <b>3.47</b> |
| Average value:  |                       |             |           |                 |               |             | <b>4.00</b>   | <b>3.46</b> |
| Theory          | Basis set Ba          | $E_0$       | $E_{ZPE}$ | $E_a$           | $E_{ZPE}^a$   | $E_v$       | $IE_v$        | $IE_a$      |
| CCSD(T,Full)    | Bausch. <i>et al.</i> | -330.616439 | 0.097133  | -330.484941     | 0.095992      | -330.469132 | <b>4.03</b>   | <b>3.60</b> |
|                 | SDD                   | -330.536540 | 0.097510  | -330.405811     | 0.096374      | -330.400240 | <b>3.75</b>   | <b>3.60</b> |
|                 | Lim <i>et al.</i>     | -330.674988 | 0.097010  | -330.542696     | 0.096055      | -330.527111 | <b>4.06</b>   | <b>3.63</b> |
| Average value:  |                       |             |           |                 |               |             | <b>3.95</b>   | <b>3.61</b> |

### Ba(H<sub>2</sub>O)<sub>4</sub>: Isomer (2+2)

| Theory          | Basis set Ba          | $E_0$       | $E_{ZPE}$ | $E[Ba(H_2O)_4]$ | $E[(H_2O)_4]$ | $E[Ba]$    | $\Delta E$    |
|-----------------|-----------------------|-------------|-----------|-----------------|---------------|------------|---------------|
| <i>mPW1PW91</i> | Bausch. <i>et al.</i> | -331.228696 | 0.097733  | -331.130963     | -305.688295   | -25.421894 | <b>-13.04</b> |
|                 | SDD                   | -331.246009 | 0.097907  | -331.148102     | -305.688295   | -25.441871 | <b>-11.25</b> |
|                 | Lim <i>et al.</i>     | -331.251568 | 0.097738  | -331.153830     | -305.688295   | -25.445939 | <b>-12.30</b> |
| Average value:  |                       |             |           |                 |               |            | <b>-12.20</b> |

  

| Theory         | Basis set Ba          | $E_0$       | $E_{ZPE}$ | $E[Ba(H_2O)_4]$ | $E[(H_2O)_4]$ | $E[Ba]$    | $\Delta E$    |
|----------------|-----------------------|-------------|-----------|-----------------|---------------|------------|---------------|
| CCSD(T,Full)   | Bausch. <i>et al.</i> | -330.612760 | 0.097733  | -330.515027     | -305.172060   | -25.322073 | <b>-13.11</b> |
|                | SDD                   | -330.531946 | 0.097907  | -330.434039     | -305.172060   | -25.258984 | <b>-1.88</b>  |
|                | Lim <i>et al.</i>     | -330.670762 | 0.097738  | -330.573024     | -305.172060   | -25.378212 | <b>-14.28</b> |
| Average value: |                       |             |           |                 |               |            | <b>-9.76</b>  |

  

| Theory          | Basis set Ba          | $E_0$       | $E_{ZPE}$ | $E_a$       | $E_{ZPE}^a$ | $E_v$       | $IE_v$      | $IE_a$      |
|-----------------|-----------------------|-------------|-----------|-------------|-------------|-------------|-------------|-------------|
| <i>mPW1PW91</i> | Bausch. <i>et al.</i> | -331.228696 | 0.097733  | -331.087648 | 0.099707    | -331.083043 | <b>4.02</b> | <b>3.89</b> |
|                 | SDD                   | -331.246009 | 0.097907  | -331.104869 | 0.099707    | -331.100016 | <b>4.02</b> | <b>3.89</b> |
|                 | Lim <i>et al.</i>     | -331.251568 | 0.097738  | -331.110105 | 0.099687    | -331.105368 | <b>4.03</b> | <b>3.90</b> |
| Average value:  |                       |             |           |             |             |             | <b>4.02</b> | <b>3.89</b> |

  

| Theory         | Basis set Ba          | $E_0$       | $E_{ZPE}$ | $E_a$       | $E_{ZPE}^a$ | $E_v$       | $IE_v$      | $IE_a$      |
|----------------|-----------------------|-------------|-----------|-------------|-------------|-------------|-------------|-------------|
| CCSD(T,Full)   | Bausch. <i>et al.</i> | -330.612760 | 0.097733  | -330.469647 | 0.099707    | -330.463626 | <b>4.11</b> | <b>3.95</b> |
|                | SDD                   | -330.531946 | 0.097907  | -330.390560 | 0.099707    | -330.384611 | <b>4.06</b> | <b>3.90</b> |
|                | Lim <i>et al.</i>     | -330.670762 | 0.097738  | -330.527619 | 0.099687    | -330.521251 | <b>4.12</b> | <b>3.95</b> |
| Average value: |                       |             |           |             |             |             | <b>4.10</b> | <b>3.93</b> |

### Ba(H<sub>2</sub>O)<sub>4</sub>: Isomer (1+2+1)

| Theory          | Basis set Ba          | $E_0$       | $E_{ZPE}$ | $E[Ba(H_2O)_4]$ | $E[(H_2O)_4]$ | $E[Ba]$    | $\Delta E$    |
|-----------------|-----------------------|-------------|-----------|-----------------|---------------|------------|---------------|
| <i>mPW1PW91</i> | Bausch. <i>et al.</i> | -331.226797 | 0.098123  | -331.128674     | -305.688295   | -25.421894 | <b>-11.60</b> |
|                 | SDD                   | -331.244948 | 0.098326  | -331.146622     | -305.688295   | -25.441871 | <b>-10.33</b> |
|                 | Lim <i>et al.</i>     | -331.250131 | 0.098165  | -331.151966     | -305.688295   | -25.445939 | <b>-11.13</b> |
| Average value:  |                       |             |           |                 |               |            | <b>-11.02</b> |

  

| Theory         | Basis set Ba          | $E_0$       | $E_{ZPE}$ | $E[Ba(H_2O)_4]$ | $E[(H_2O)_4]$ | $E[Ba]$    | $\Delta E$    |
|----------------|-----------------------|-------------|-----------|-----------------|---------------|------------|---------------|
| CCSD(T,Full)   | Bausch. <i>et al.</i> | -330.609833 | 0.098123  | -330.511710     | -305.172060   | -25.322073 | <b>-11.03</b> |
|                | SDD                   | -330.529795 | 0.098326  | -330.431469     | -305.172060   | -25.258984 | <b>-0.27</b>  |
|                | Lim <i>et al.</i>     | -330.666853 | 0.098165  | -330.568688     | -305.172060   | -25.378212 | <b>-11.56</b> |
| Average value: |                       |             |           |                 |               |            | <b>-7.62</b>  |

  

| Theory          | Basis set Ba          | $E_0$       | $E_{ZPE}$ | $E_a$       | $E_{ZPE}^a$ | $E_v$       | $IE_v$      | $IE_a$      |
|-----------------|-----------------------|-------------|-----------|-------------|-------------|-------------|-------------|-------------|
| <i>mPW1PW91</i> | Bausch. <i>et al.</i> | -331.226797 | 0.098123  | -331.083506 | 0.098530    | -331.069665 | <b>4.29</b> | <b>3.91</b> |
|                 | SDD                   | -331.244948 | 0.098326  | -331.101302 | 0.098654    | -331.087650 | <b>4.29</b> | <b>3.92</b> |
|                 | Lim <i>et al.</i>     | -331.250131 | 0.098165  | -331.106221 | 0.098553    | -331.092231 | <b>4.31</b> | <b>3.93</b> |
| Average value:  |                       |             |           |             |             |             | <b>4.29</b> | <b>3.92</b> |

  

| Theory         | Basis set Ba          | $E_0$       | $E_{ZPE}$ | $E_a$       | $E_{ZPE}^a$ | $E_v$       | $IE_v$      | $IE_a$      |
|----------------|-----------------------|-------------|-----------|-------------|-------------|-------------|-------------|-------------|
| CCSD(T,Full)   | Bausch. <i>et al.</i> | -330.609833 | 0.098123  | -330.463824 | 0.098530    | -330.448997 | <b>4.39</b> | <b>3.98</b> |
|                | SDD                   | -330.529795 | 0.098326  | -330.386147 | 0.098654    | -330.372046 | <b>4.30</b> | <b>3.92</b> |
|                | Lim <i>et al.</i>     | -330.666853 | 0.098165  | -330.520200 | 0.098553    | -330.505260 | <b>4.41</b> | <b>4.00</b> |
| Average value: |                       |             |           |             |             |             | <b>4.37</b> | <b>3.97</b> |

### Ba(H<sub>2</sub>O)<sub>4</sub>: Isomer (1+1+1+1)

| Theory          | Basis set Ba          | $E_0$       | $E_{ZPE}$ | $E[Ba(H_2O)_4]$ | $E[(H_2O)_4]$ | $E[Ba]$    | $\Delta E$    |
|-----------------|-----------------------|-------------|-----------|-----------------|---------------|------------|---------------|
| <i>mPW1PW91</i> | Bausch. <i>et al.</i> | -331.229827 | 0.098272  | -331.131555     | -305.688295   | -25.421894 | <b>-13.41</b> |
|                 | SDD                   | -331.247955 | 0.098466  | -331.149489     | -305.688295   | -25.441871 | <b>-12.13</b> |
|                 | Lim <i>et al.</i>     | -331.253093 | 0.098241  | -331.154852     | -305.688295   | -25.445939 | <b>-12.94</b> |
| Average value:  |                       |             |           |                 |               |            | <b>-12.82</b> |

  

| Theory         | Basis set Ba          | $E_0$       | $E_{ZPE}$ | $E[Ba(H_2O)_4]$ | $E[(H_2O)_4]$ | $E[Ba]$    | $\Delta E$    |
|----------------|-----------------------|-------------|-----------|-----------------|---------------|------------|---------------|
| CCSD(T,Full)   | Bausch. <i>et al.</i> | -330.612015 | 0.098272  | -330.513743     | -305.172060   | -25.322073 | <b>-12.31</b> |
|                | SDD                   | -330.532068 | 0.098466  | -330.433602     | -305.172060   | -25.258984 | <b>-1.61</b>  |
|                | Lim <i>et al.</i>     | -330.668715 | 0.098241  | -330.570474     | -305.172060   | -25.378212 | <b>-12.68</b> |
| Average value: |                       |             |           |                 |               |            | <b>-8.86</b>  |

  

| Theory          | Basis set Ba          | $E_0$       | $E_{ZPE}$ | $E_a$       | $E_{ZPE}^a$ | $E_v$       | $IE_v$      | $IE_a$      |
|-----------------|-----------------------|-------------|-----------|-------------|-------------|-------------|-------------|-------------|
| <i>mPW1PW91</i> | Bausch. <i>et al.</i> | -331.229827 | 0.098272  | -331.080818 | 0.098474    | -331.067843 | <b>4.41</b> | <b>4.06</b> |
|                 | SDD                   | -331.247955 | 0.098466  | -331.098643 | 0.098642    | -331.085296 | <b>4.43</b> | <b>4.07</b> |
|                 | Lim <i>et al.</i>     | -331.253093 | 0.098241  | -331.103501 | 0.098452    | -331.090110 | <b>4.44</b> | <b>4.08</b> |
| Average value:  |                       |             |           |             |             |             | <b>4.43</b> | <b>4.07</b> |

  

| Theory         | Basis set Ba          | $E_0$       | $E_{ZPE}$ | $E_a$       | $E_{ZPE}^a$ | $E_v$       | $IE_v$      | $IE_a$      |
|----------------|-----------------------|-------------|-----------|-------------|-------------|-------------|-------------|-------------|
| CCSD(T,Full)   | Bausch. <i>et al.</i> | -330.612015 | 0.098272  | -330.459614 | 0.098474    | -330.446258 | <b>4.52</b> | <b>4.15</b> |
|                | SDD                   | -330.532068 | 0.098466  | -330.382364 | 0.098642    | -330.369215 | <b>4.44</b> | <b>4.08</b> |
|                | Lim <i>et al.</i>     | -330.668715 | 0.098241  | -330.515888 | 0.098452    | -330.501893 | <b>4.55</b> | <b>4.16</b> |
| Average value: |                       |             |           |             |             |             | <b>4.50</b> | <b>4.13</b> |

## Neutral barium-water clusters:

### Ba<sup>+</sup>(H<sub>2</sub>O)<sub>1</sub>: Isomer 1<sup>+</sup>

| Theory                | Basis set Ba          | $E_a$       | $E_{ZPE}^a$ | $E^-[Ba^+(H_2O)_1]$ | $E[(H_2O)_1]$ | $E[Ba^+]$  | $\Delta E$    |
|-----------------------|-----------------------|-------------|-------------|---------------------|---------------|------------|---------------|
| mPW1PW91              | Bausch. <i>et al.</i> | -101.710805 | 0.023623    | -101.687182         | -76.413183    | -25.236026 | <b>-23.83</b> |
|                       | SDD                   | -101.728590 | 0.023746    | -101.704844         | -76.413183    | -25.255232 | <b>-22.86</b> |
|                       | Lim <i>et al.</i>     | -101.733396 | 0.023608    | -101.709788         | -76.413183    | -25.258481 | <b>-23.92</b> |
| <b>Average value:</b> |                       |             |             |                     |               |            | <b>-23.54</b> |
| Theory                | Basis set Ba          | $E_a$       | $E_{ZPE}^a$ | $E^-[Ba^+(H_2O)_1]$ | $E[(H_2O)_1]$ | $E[Ba^+]$  | $\Delta E$    |
| CCSD(T,Full)          | Bausch. <i>et al.</i> | -101.477839 | 0.023623    | -101.454216         | -76.284245    | -25.133532 | <b>-22.87</b> |
|                       | SDD                   | -101.401429 | 0.023746    | -101.377683         | -76.284245    | -25.073281 | <b>-12.65</b> |
|                       | Lim <i>et al.</i>     | -101.533780 | 0.023608    | -101.510172         | -76.284245    | -25.187920 | <b>-23.85</b> |
| <b>Average value:</b> |                       |             |             |                     |               |            | <b>-19.79</b> |

### Ba<sup>+</sup>(H<sub>2</sub>O)<sub>2</sub>: Isomer (2+0)<sup>+</sup>

| Theory                | Basis set Ba          | $E_a$       | $E_{ZPE}^a$ | $E^-[Ba^+(H_2O)_2]$ | $E[(H_2O)_2]$ | $E[Ba^+]$  | $\Delta E$    |
|-----------------------|-----------------------|-------------|-------------|---------------------|---------------|------------|---------------|
| mPW1PW91              | Bausch. <i>et al.</i> | -178.181194 | 0.047583    | -178.133611         | -152.831962   | -25.236026 | <b>-41.18</b> |
|                       | SDD                   | -178.199286 | 0.047775    | -178.151511         | -152.831962   | -25.255232 | <b>-40.36</b> |
|                       | Lim <i>et al.</i>     | -178.203782 | 0.047550    | -178.156232         | -152.831962   | -25.258481 | <b>-41.28</b> |
| <b>Average value:</b> |                       |             |             |                     |               |            | <b>-40.94</b> |
| Theory                | Basis set Ba          | $E_a$       | $E_{ZPE}^a$ | $E^-[Ba^+(H_2O)_2]$ | $E[(H_2O)_2]$ | $E[Ba^+]$  | $\Delta E$    |
| CCSD(T,Full)          | Bausch. <i>et al.</i> | -177.818834 | 0.047583    | -177.771251         | -152.574371   | -25.133532 | <b>-39.75</b> |
|                       | SDD                   | -177.740975 | 0.047775    | -177.693200         | -152.574371   | -25.073281 | <b>-28.58</b> |
|                       | Lim <i>et al.</i>     | -177.875773 | 0.047550    | -177.828223         | -152.574371   | -25.187920 | <b>-41.37</b> |
| <b>Average value:</b> |                       |             |             |                     |               |            | <b>-36.57</b> |

### Ba<sup>+</sup>(H<sub>2</sub>O)<sub>2</sub>: Isomer (1+1)<sup>+</sup>

| Theory                | Basis set Ba          | $E_a$       | $E_{ZPE}^a$ | $E^-[Ba^+(H_2O)_2]$ | $E[(H_2O)_2]$ | $E[Ba^+]$  | $\Delta E$    |
|-----------------------|-----------------------|-------------|-------------|---------------------|---------------|------------|---------------|
| mPW1PW91              | Bausch. <i>et al.</i> | -178.172484 | 0.048990    | -178.123494         | -152.831962   | -25.236026 | <b>-34.83</b> |
|                       | SDD                   | -178.190300 | 0.049047    | -178.141253         | -152.831962   | -25.255232 | <b>-33.92</b> |
|                       | Lim <i>et al.</i>     | -178.195104 | 0.048972    | -178.146132         | -152.831962   | -25.258481 | <b>-34.95</b> |
| <b>Average value:</b> |                       |             |             |                     |               |            | <b>-34.57</b> |
| Theory                | Basis set Ba          | $E_a$       | $E_{ZPE}^a$ | $E^-[Ba^+(H_2O)_2]$ | $E[(H_2O)_2]$ | $E[Ba^+]$  | $\Delta E$    |
| CCSD(T,Full)          | Bausch. <i>et al.</i> | -177.810139 | 0.048990    | -177.761149         | -152.574371   | -25.133532 | <b>-33.41</b> |
|                       | SDD                   | -177.733171 | 0.049047    | -177.684124         | -152.574371   | -25.073281 | <b>-22.89</b> |
|                       | Lim <i>et al.</i>     | -177.866257 | 0.048972    | -177.817285         | -152.574371   | -25.187920 | <b>-34.51</b> |
| <b>Average value:</b> |                       |             |             |                     |               |            | <b>-30.27</b> |

### Ba<sup>+</sup>(H<sub>2</sub>O)<sub>3</sub>: Isomer (3+0)<sup>+</sup>

| Theory                | Basis set Ba          | $E_a$       | $E_{ZPE}^a$ | $E^-[Ba^+(H_2O)_3]$ | $E[(H_2O)_3]$ | $E[Ba^+]$  | $\Delta E$    |
|-----------------------|-----------------------|-------------|-------------|---------------------|---------------|------------|---------------|
| mPW1PW91              | Bausch. <i>et al.</i> | -254.647647 | 0.071256    | -254.576391         | -229.258051   | -25.236026 | <b>-51.65</b> |
|                       | SDD                   | -254.666178 | 0.071554    | -254.594624         | -229.258051   | -25.255232 | <b>-51.04</b> |
|                       | Lim <i>et al.</i>     | -254.670312 | 0.071253    | -254.599059         | -229.258051   | -25.258481 | <b>-51.79</b> |
| <b>Average value:</b> |                       |             |             |                     |               |            | <b>-51.49</b> |
| Theory                | Basis set Ba          | $E_a$       | $E_{ZPE}^a$ | $E^-[Ba^+(H_2O)_3]$ | $E[(H_2O)_3]$ | $E[Ba^+]$  | $\Delta E$    |
| CCSD(T,Full)          | Bausch. <i>et al.</i> | -254.156681 | 0.071256    | -254.085425         | -228.871337   | -25.133532 | <b>-50.55</b> |
|                       | SDD                   | -254.077773 | 0.071554    | -254.006219         | -228.871337   | -25.073281 | <b>-38.65</b> |
|                       | Lim <i>et al.</i>     | -254.214468 | 0.071253    | -254.143215         | -228.871337   | -25.187920 | <b>-52.68</b> |
| <b>Average value:</b> |                       |             |             |                     |               |            | <b>-47.30</b> |

### Ba<sup>+</sup>(H<sub>2</sub>O)<sub>3</sub>: Isomer (2+1)<sup>+</sup>

| Theory                | Basis set Ba          | $E_a$       | $E_{ZPE}^a$ | $E^-[Ba^+(H_2O)_3]$ | $E[(H_2O)_3]$ | $E[Ba^+]$  | $\Delta E$    |
|-----------------------|-----------------------|-------------|-------------|---------------------|---------------|------------|---------------|
| mPW1PW91              | Bausch. <i>et al.</i> | -254.639968 | 0.074516    | -254.565452         | -229.258051   | -25.236026 | <b>-44.79</b> |
|                       | SDD                   | -254.658154 | 0.074790    | -254.583364         | -229.258051   | -25.255232 | <b>-43.98</b> |
|                       | Lim <i>et al.</i>     | -254.662580 | 0.074535    | -254.588045         | -229.258051   | -25.258481 | <b>-44.88</b> |
| <b>Average value:</b> |                       |             |             |                     |               |            | <b>-44.55</b> |

| Theory                | Basis set Ba          | $E_a$       | $E_{ZPE}^a$ | $E^-[Ba^+(H_2O)_3]$ | $E[(H_2O)_3]$ | $E[Ba^+]$  | $\Delta E$    |
|-----------------------|-----------------------|-------------|-------------|---------------------|---------------|------------|---------------|
| CCSD(T,Full)          | Bausch. <i>et al.</i> | -254.151178 | 0.074516    | -254.076662         | -228.871337   | -25.133532 | <b>-45.05</b> |
|                       | SDD                   | -254.073139 | 0.074790    | -253.998349         | -228.871337   | -25.073281 | <b>-33.72</b> |
|                       | Lim <i>et al.</i>     | -254.208109 | 0.074535    | -254.133574         | -228.871337   | -25.187920 | <b>-46.63</b> |
| <b>Average value:</b> |                       |             |             |                     |               |            | <b>-41.80</b> |

### Ba<sup>+</sup>(H<sub>2</sub>O)<sub>3</sub>: Isomer (1+1+1)<sup>+</sup>

| Theory                | Basis set Ba          | $E_a$       | $E_{ZPE}^a$ | $E^-[Ba^+(H_2O)_3]$ | $E[(H_2O)_3]$ | $E[Ba^+]$  | $\Delta E$    |
|-----------------------|-----------------------|-------------|-------------|---------------------|---------------|------------|---------------|
| mPW1PW91              | Bausch. <i>et al.</i> | -254.628024 | 0.073661    | -254.554363         | -229.258051   | -25.236026 | <b>-37.83</b> |
|                       | SDD                   | -254.645922 | 0.073851    | -254.572071         | -229.258051   | -25.255232 | <b>-36.89</b> |
|                       | Lim <i>et al.</i>     | -254.650715 | 0.073699    | -254.577016         | -229.258051   | -25.258481 | <b>-37.95</b> |
| <b>Average value:</b> |                       |             |             |                     |               |            | <b>-37.56</b> |

| Theory                | Basis set Ba          | $E_a$       | $E_{ZPE}^a$ | $E^-[Ba^+(H_2O)_3]$ | $E[(H_2O)_3]$ | $E[Ba^+]$  | $\Delta E$    |
|-----------------------|-----------------------|-------------|-------------|---------------------|---------------|------------|---------------|
| CCSD(T,Full)          | Bausch. <i>et al.</i> | -254.136138 | 0.073661    | -254.062477         | -228.871337   | -25.133532 | <b>-36.15</b> |
|                       | SDD                   | -254.059150 | 0.073851    | -253.985299         | -228.871337   | -25.073281 | <b>-25.53</b> |
|                       | Lim <i>et al.</i>     | -254.192495 | 0.073699    | -254.118796         | -228.871337   | -25.187920 | <b>-37.36</b> |
| <b>Average value:</b> |                       |             |             |                     |               |            | <b>-33.01</b> |

### Ba<sup>+</sup>(H<sub>2</sub>O)<sub>4</sub>: Isomer (4+0)<sup>+</sup>

| Theory                | Basis set Ba          | $E_a$       | $E_{ZPE}^a$ | $E^-[Ba^+(H_2O)_4]$ | $E[(H_2O)_4]$ | $E[Ba^+]$  | $\Delta E$    |
|-----------------------|-----------------------|-------------|-------------|---------------------|---------------|------------|---------------|
| mPW1PW91              | Bausch. <i>et al.</i> | -331.107980 | 0.094301    | -331.013679         | -305.688295   | -25.236026 | <b>-56.07</b> |
|                       | SDD                   | -331.126638 | 0.094529    | -331.032109         | -305.688295   | -25.255232 | <b>-55.59</b> |
|                       | Lim <i>et al.</i>     | -331.130648 | 0.094304    | -331.036344         | -305.688295   | -25.258481 | <b>-56.20</b> |
| <b>Average value:</b> |                       |             |             |                     |               |            | <b>-55.95</b> |

| Theory                | Basis set Ba          | $E_a$       | $E_{ZPE}^a$ | $E^-[Ba^+(H_2O)_4]$ | $E[(H_2O)_4]$ | $E[Ba^+]$  | $\Delta E$    |
|-----------------------|-----------------------|-------------|-------------|---------------------|---------------|------------|---------------|
| CCSD(T,Full)          | Bausch. <i>et al.</i> | -330.490068 | 0.094301    | -330.395767         | -305.172060   | -25.133532 | <b>-56.59</b> |
|                       | SDD                   | -330.412556 | 0.094529    | -330.318027         | -305.172060   | -25.073281 | <b>-45.61</b> |
|                       | Lim <i>et al.</i>     | -330.549527 | 0.094304    | -330.455223         | -305.172060   | -25.187920 | <b>-59.77</b> |
| <b>Average value:</b> |                       |             |             |                     |               |            | <b>-53.99</b> |

### Ba<sup>+</sup>(H<sub>2</sub>O)<sub>4</sub>: Isomer (3+1)<sub>a</sub><sup>+</sup>

| Theory                | Basis set Ba          | $E_a$       | $E_{ZPE}^a$ | $E^-[Ba^+(H_2O)_4]$ | $E[(H_2O)_4]$ | $E[Ba^+]$  | $\Delta E$    |
|-----------------------|-----------------------|-------------|-------------|---------------------|---------------|------------|---------------|
| mPW1PW91              | Bausch. <i>et al.</i> | -331.104664 | 0.095992    | -331.008672         | -305.688295   | -25.236026 | <b>-52.93</b> |
|                       | SDD                   | -331.123153 | 0.096374    | -331.026779         | -305.688295   | -25.255232 | <b>-52.24</b> |
|                       | Lim <i>et al.</i>     | -331.127276 | 0.096055    | -331.031221         | -305.688295   | -25.258481 | <b>-52.99</b> |
| <b>Average value:</b> |                       |             |             |                     |               |            | <b>-52.72</b> |

| Theory                | Basis set Ba          | $E_a$       | $E_{ZPE}^a$ | $E^-[Ba^+(H_2O)_4]$ | $E[(H_2O)_4]$ | $E[Ba^+]$  | $\Delta E$    |
|-----------------------|-----------------------|-------------|-------------|---------------------|---------------|------------|---------------|
| CCSD(T,Full)          | Bausch. <i>et al.</i> | -330.484941 | 0.095992    | -330.388949         | -305.172060   | -25.133532 | <b>-52.31</b> |
|                       | SDD                   | -330.405811 | 0.096374    | -330.309437         | -305.172060   | -25.073281 | <b>-40.22</b> |
|                       | Lim <i>et al.</i>     | -330.542696 | 0.096055    | -330.446641         | -305.172060   | -25.187920 | <b>-54.38</b> |
| <b>Average value:</b> |                       |             |             |                     |               |            | <b>-48.97</b> |

### Ba<sup>+</sup>(H<sub>2</sub>O)<sub>4</sub>: Isomer (3+1)<sub>b</sub><sup>+</sup>

| Theory          | Basis set Ba          | $E_a$              | $E_{ZPE}^a$ | $E^-[Ba^+(H_2O)_4]$ | $E[(H_2O)_4]$ | $E[Ba^+]$  | $\Delta E$    |
|-----------------|-----------------------|--------------------|-------------|---------------------|---------------|------------|---------------|
| <i>mPW1PW91</i> | Bausch. <i>et al.</i> | -331.105578        | 0.097963    | -331.007615         | -305.688295   | -25.236026 | <b>-52.27</b> |
|                 | SDD                   | -331.124040        | 0.098176    | -331.025864         | -305.688295   | -25.255232 | <b>-51.67</b> |
|                 | Lim <i>et al.</i>     | -331.128157        | 0.097947    | -331.030210         | -305.688295   | -25.258481 | <b>-52.36</b> |
| Average value:  |                       |                    |             |                     |               |            | <b>-52.10</b> |
| <hr/>           |                       |                    |             |                     |               |            |               |
| Theory          | Basis set Ba          | $E_a$              | $E_{ZPE}^a$ | $E^-[Ba^+(H_2O)_4]$ | $E[(H_2O)_4]$ | $E[Ba^+]$  | $\Delta E$    |
| CCSD(T,Full)    | Bausch. <i>et al.</i> | -330.488888        | 0.097963    | -330.390925         | -305.172060   | -25.133532 | <b>-53.55</b> |
|                 | SDD                   | -330.410619        | 0.098176    | -330.312443         | -305.172060   | -25.073281 | <b>-42.11</b> |
|                 | Lim <i>et al.</i>     | <b>-330,546817</b> | 0.097947    | <b>-330,448870</b>  | -305.172060   | -25.187920 | <b>-55.78</b> |
| Average value:  |                       |                    |             |                     |               |            | <b>-50.48</b> |

### Ba<sup>+</sup>(H<sub>2</sub>O)<sub>4</sub>: Isomer (2+2)<sub>a</sub><sup>+</sup>

| Theory          | Basis set Ba          | $E_a$       | $E_{ZPE}^a$ | $E^-[Ba^+(H_2O)_4]$ | $E[(H_2O)_4]$ | $E[Ba^+]$  | $\Delta E$    |
|-----------------|-----------------------|-------------|-------------|---------------------|---------------|------------|---------------|
| <i>mPW1PW91</i> | Bausch. <i>et al.</i> | -331.098052 | 0.097715    | -331.000337         | -305.688295   | -25.236026 | <b>-47.70</b> |
|                 | SDD                   | -331.116183 | 0.097907    | -331.018276         | -305.688295   | -25.255232 | <b>-46.91</b> |
|                 | Lim <i>et al.</i>     | -331.120654 | 0.097764    | -331.022890         | -305.688295   | -25.258481 | <b>-47.76</b> |
| Average value:  |                       |             |             |                     |               |            | <b>-47.46</b> |
| <hr/>           |                       |             |             |                     |               |            |               |
| Theory          | Basis set Ba          | $E_a$       | $E_{ZPE}^a$ | $E^-[Ba^+(H_2O)_4]$ | $E[(H_2O)_4]$ | $E[Ba^+]$  | $\Delta E$    |
| CCSD(T,Full)    | Bausch. <i>et al.</i> | -330.478809 | 0.097715    | -330.381094         | -305.172060   | -25.133532 | <b>-47.38</b> |
|                 | SDD                   | -330.400879 | 0.097907    | -330.302972         | -305.172060   | -25.073281 | <b>-36.16</b> |
|                 | Lim <i>et al.</i>     | -330,536113 | 0.097764    | -330,438349         | -305.172060   | -25.187920 | <b>-49,18</b> |
| Average value:  |                       |             |             |                     |               |            | <b>-44,24</b> |

### Ba<sup>+</sup>(H<sub>2</sub>O)<sub>4</sub>: Isomer (2+2)<sub>b</sub><sup>+</sup>

| Theory          | Basis set Ba          | $E_a$       | $E_{ZPE}^a$ | $E^-[Ba^+(H_2O)_4]$ | $E[(H_2O)_4]$ | $E[Ba^+]$  | $\Delta E$    |
|-----------------|-----------------------|-------------|-------------|---------------------|---------------|------------|---------------|
| <i>mPW1PW91</i> | Bausch. <i>et al.</i> | -331.087648 | 0.099707    | -330.987941         | -305.688295   | -25.236026 | <b>-39.92</b> |
|                 | SDD                   | -331.104869 | 0.099707    | -331.005162         | -305.688295   | -25.255232 | <b>-38.68</b> |
|                 | Lim <i>et al.</i>     | -331.110105 | 0.099687    | -331.010418         | -305.688295   | -25.258481 | <b>-39.94</b> |
| Average value:  |                       |             |             |                     |               |            | <b>-39.51</b> |
| <hr/>           |                       |             |             |                     |               |            |               |
| Theory          | Basis set Ba          | $E_a$       | $E_{ZPE}^a$ | $E^-[Ba^+(H_2O)_4]$ | $E[(H_2O)_4]$ | $E[Ba^+]$  | $\Delta E$    |
| CCSD(T,Full)    | Bausch. <i>et al.</i> | -330.469647 | 0.099707    | -330.369940         | -305.172060   | -25.133532 | <b>-40.38</b> |
|                 | SDD                   | -330.390560 | 0.099707    | -330.290853         | -305.172060   | -25.073281 | <b>-28.56</b> |
|                 | Lim <i>et al.</i>     | -330,527619 | 0.099687    | -330,427932         | -305.172060   | -25.187920 | <b>-42,64</b> |
| Average value:  |                       |             |             |                     |               |            | <b>-37,19</b> |

### Ba<sup>+</sup>(H<sub>2</sub>O)<sub>4</sub>: Isomer (1+2+1)<sup>+</sup>

| Theory          | Basis set Ba          | $E_a$       | $E_{ZPE}^a$ | $E^-[Ba^+(H_2O)_4]$ | $E[(H_2O)_4]$ | $E[Ba^+]$  | $\Delta E$    |
|-----------------|-----------------------|-------------|-------------|---------------------|---------------|------------|---------------|
| <i>mPW1PW91</i> | Bausch. <i>et al.</i> | -331.083506 | 0.098530    | -330.984976         | -305.688295   | -25.236026 | <b>-38.06</b> |
|                 | SDD                   | -331.101302 | 0.098654    | -331.002648         | -305.688295   | -25.255232 | <b>-37.10</b> |
|                 | Lim <i>et al.</i>     | -331.106221 | 0.098553    | -331.007668         | -305.688295   | -25.258481 | <b>-38.21</b> |
| Average value:  |                       |             |             |                     |               |            | <b>-37.79</b> |
| <hr/>           |                       |             |             |                     |               |            |               |
| Theory          | Basis set Ba          | $E_a$       | $E_{ZPE}^a$ | $E^-[Ba^+(H_2O)_4]$ | $E[(H_2O)_4]$ | $E[Ba^+]$  | $\Delta E$    |
| CCSD(T,Full)    | Bausch. <i>et al.</i> | -330.463824 | 0.098530    | -330.365294         | -305.172060   | -25.133532 | <b>-37.46</b> |
|                 | SDD                   | -330.386147 | 0.098654    | -330.287493         | -305.172060   | -25.073281 | <b>-26.45</b> |
|                 | Lim <i>et al.</i>     | -330,520200 | 0.098553    | -330,421647         | -305.172060   | -25.187920 | <b>-38,70</b> |
| Average value:  |                       |             |             |                     |               |            | <b>-34,20</b> |

### Ba<sup>+</sup>(H<sub>2</sub>O)<sub>4</sub>: Isomer (1+1+1+1)<sup>+</sup>

| Theory         | Basis set Ba          | $E_a$       | $E_{ZPE}^a$ | $E^a[\text{Ba}^+(\text{H}_2\text{O})_4]$ | $E[(\text{H}_2\text{O})_4]$ | $E[\text{Ba}^+]$ | $\Delta E$    |
|----------------|-----------------------|-------------|-------------|------------------------------------------|-----------------------------|------------------|---------------|
| mPW1PW91       | Bausch. <i>et al.</i> | -331.080818 | 0.098474    | -330.982344                              | -305.688295                 | -25.236026       | <b>-36.41</b> |
|                | SDD                   | -331.098643 | 0.098642    | -331.000001                              | -305.688295                 | -25.255232       | <b>-35.44</b> |
|                | Lim <i>et al.</i>     | -331.103501 | 0.098452    | -331.005049                              | -305.688295                 | -25.258481       | <b>-36.57</b> |
| Average value: |                       |             |             |                                          |                             |                  | <b>-36.14</b> |

| Theory         | Basis set Ba          | $E_a$       | $E_{ZPE}^a$ | $E^a[\text{Ba}^+(\text{H}_2\text{O})_4]$ | $E[(\text{H}_2\text{O})_4]$ | $E[\text{Ba}^+]$ | $\Delta E$    |
|----------------|-----------------------|-------------|-------------|------------------------------------------|-----------------------------|------------------|---------------|
| CCSD(T,Full)   | Bausch. <i>et al.</i> | -330.459614 | 0.098474    | -330.361140                              | -305.172060                 | -25.133532       | <b>-34.86</b> |
|                | SDD                   | -330.382364 | 0.098642    | -330.283722                              | -305.172060                 | -25.073281       | <b>-24.08</b> |
|                | Lim <i>et al.</i>     | -330.515888 | 0.098452    | -330.417436                              | -305.172060                 | -25.187920       | <b>-36.05</b> |
| Average value: |                       |             |             |                                          |                             |                  | <b>-31.67</b> |

### Comparison of different RECP's used for the Ba atom:

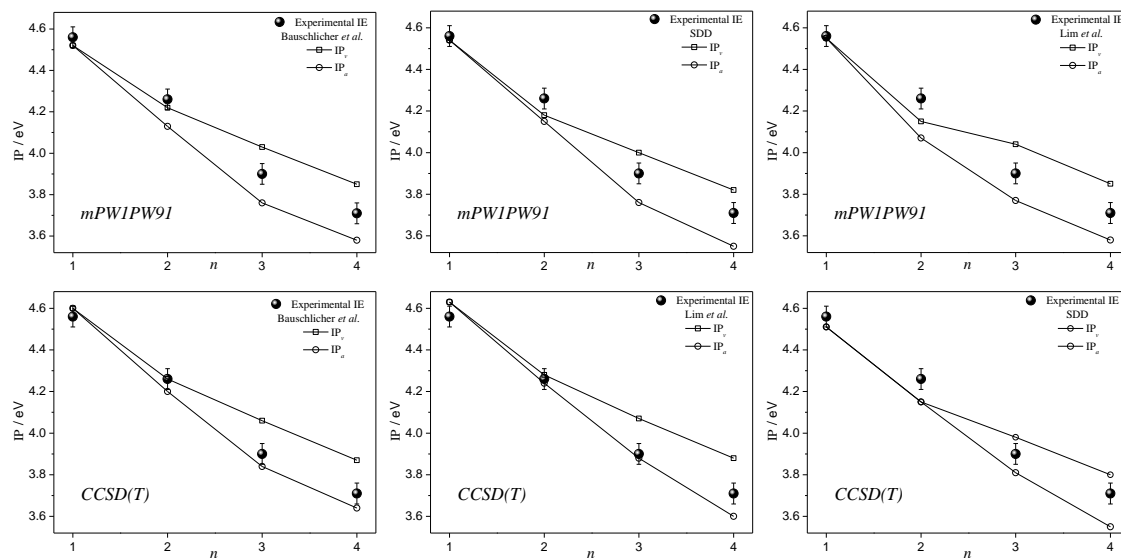

Supplement: c2cp23510b.pdf [file c2cp23510b.pdf]
